# Supplementary material for: Human iPSC-derived neural progenitor cells secreting GDNF provide protection in rodent models of ALS and retinal degeneration
Source: PubMed Central journal article supplement (PMC10444557; doi:10.1016/j.stemcr.2023.03.016), 2023-04-20
Supplement: mmc1.pdf [file mmc1.pdf]

**Stem Cell Reports, Volume 18**

**Supplemental Information**

**Human iPSC-derived neural progenitor cells secreting GDNF provide protection in rodent models of ALS and retinal degeneration**

**Alexander H. Laperle, V. Alexandra Moser, Pablo Avalos, Bin Lu, Amanda Wu, Aaron Fulton, Stephany Ramirez, Veronica J. Garcia, Shaughn Bell, Ritchie Ho, George Lawless, Kristina Roxas, Saba Shahin, Oksana Shelest, Soshana Svendsen, Shaomei Wang, and Clive N. Svendsen**

## Supplemental Materials

### Supplemental Figures

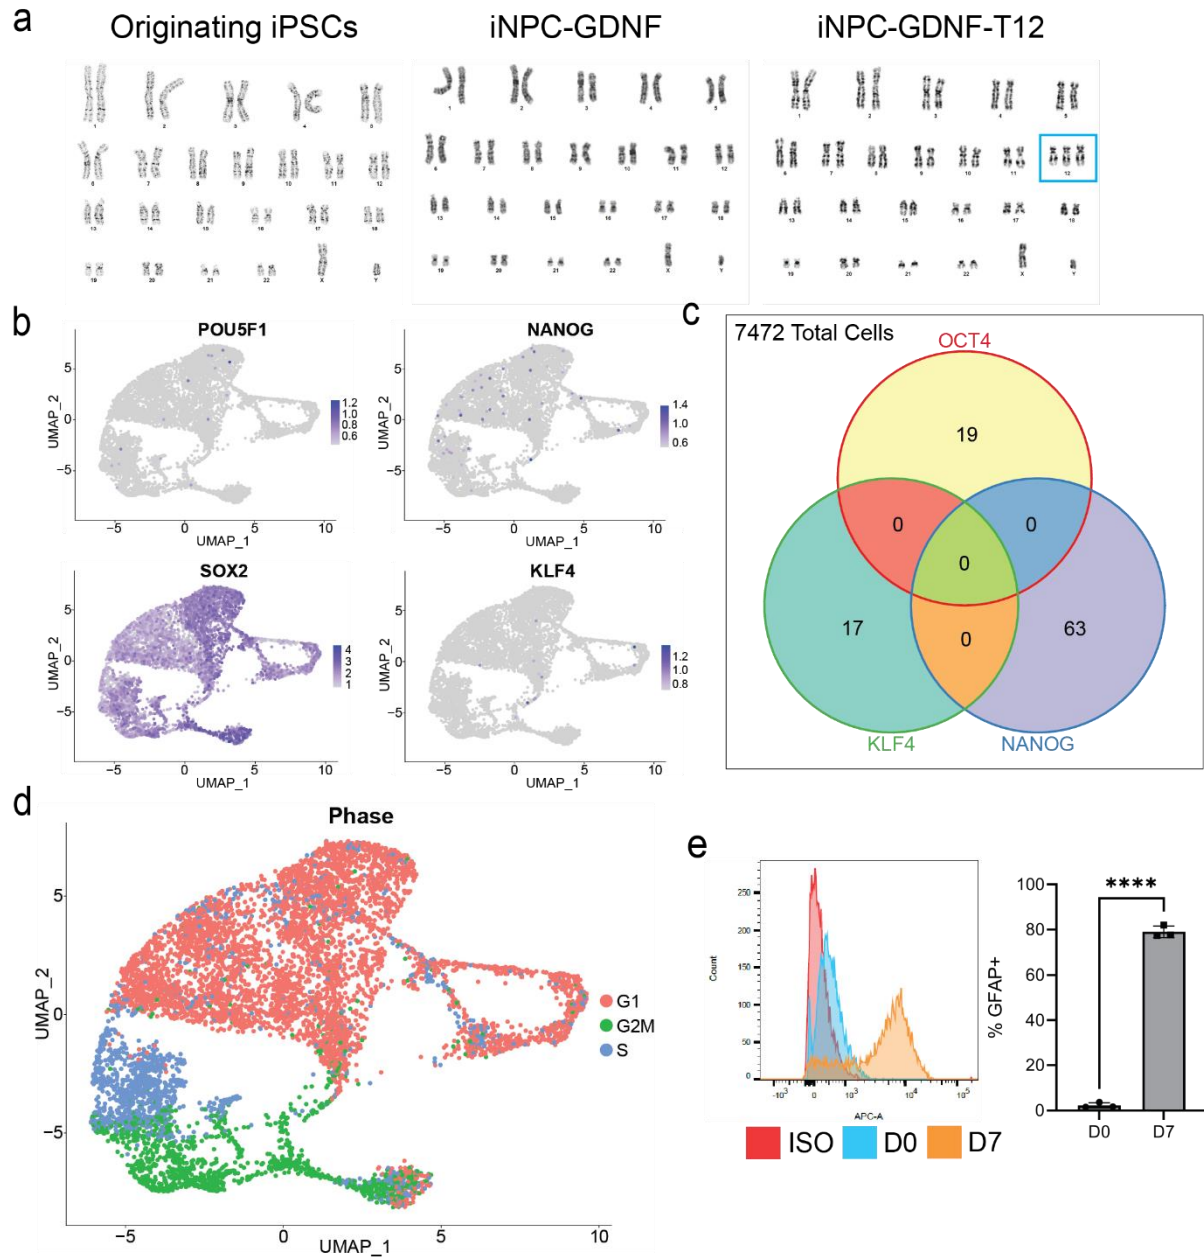

**Figure S1: Extended iNPC-GDNF characterization, related to Figure 1:** (a) G-band karyotype of originating iPSCs and two iNPC-GDNF batches. iNPC-GDNF-WT retained a normal karyotype while iNPC-GDNF-T12 developed nearly 100% trisomy of chromosome 12 (blue box). (b) Feature plots show expression of pluripotency genes. (c) Venn diagram of cells expressing multiple pluripotency genes. (d) snRNA-seq clustering grouped by cell cycle. (e) Histograms comparing GFAP levels at D0 and D7, with a control of isotype-stained cells (ISO), and quantification of % GFAP+ cells at D0 and D7. \*\*\*\*  $p < 0.0001$  via unpaired t test with Welch's correction.

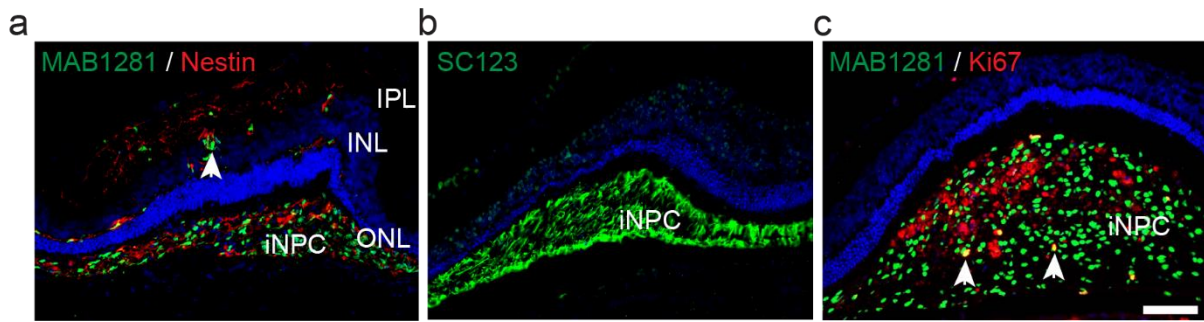

**Figure S2: Extended characterization of iNPC-GDNFs in the RCS rat eye, related to Figure 2.** Grafted iNPC-GDNFs from D90 RCS rat eyes were positive for MAB1281 and human nestin (a) and SC123 (b). (c) MAB1281 and Ki67 staining shows minimal double-positive cells (arrowheads). Scale bar = 75  $\mu\text{m}$ . INL: Inner nuclear layer, IPL: Inner plexiform layer, ONL: Outer nuclear layer.

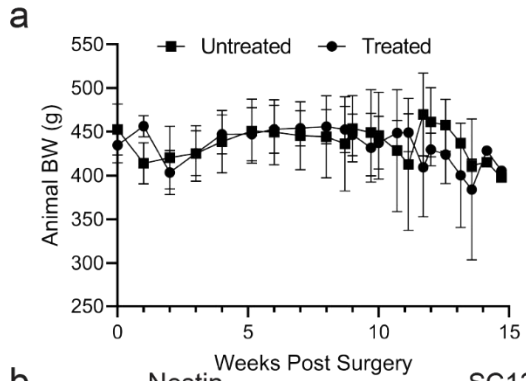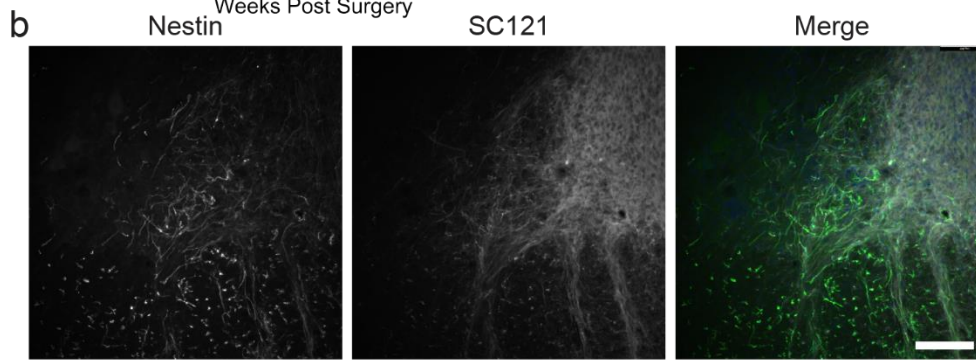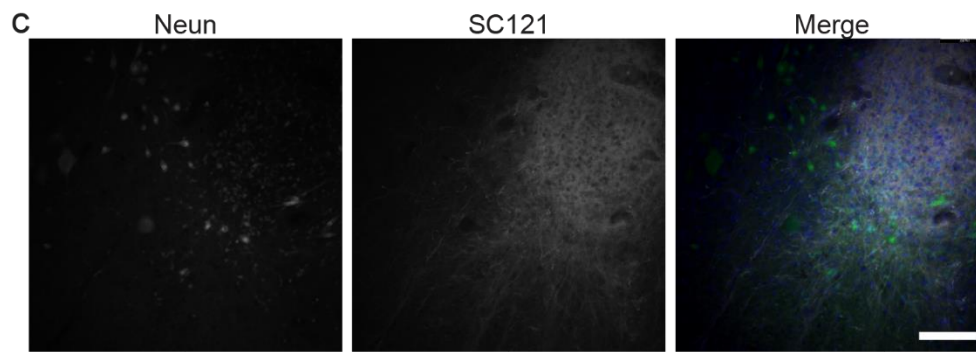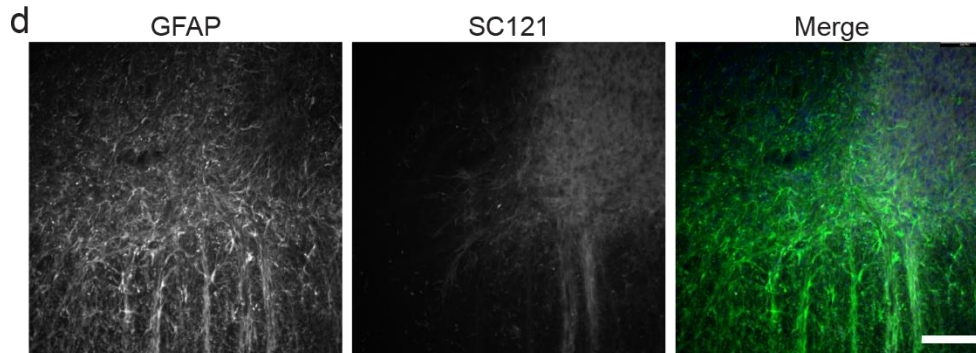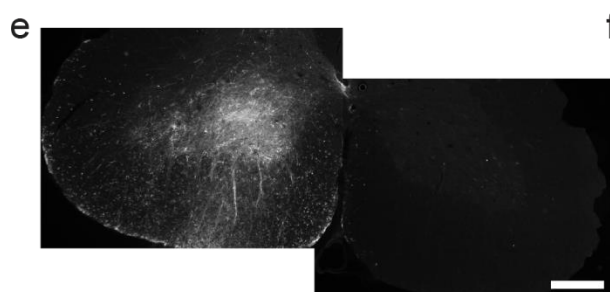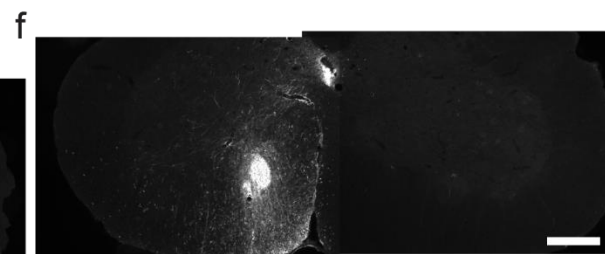

**Figure S3: Extended characterization of iNPC-GDNFs in the SOD1<sup>G93A</sup> rat spinal cord, related to Figure 3.** (a) Body weight (grams) of all animals after transplantation are similar between treated and untreated rats. Immunofluorescence showing iNPC-GDNFs stained with SC121 along with (b) Nestin, (c) Neun, and (d) GFAP. Immunohistochemistry showing SC121 in the spinal cord of (e) animal #239 (highest treated limb BBB score at onset) and (f) animal #240 (lowest treated hindlimb BBB score at onset). Scale bars = 100  $\mu\text{m}$  (b-d) and 250  $\mu\text{m}$  (e,f).

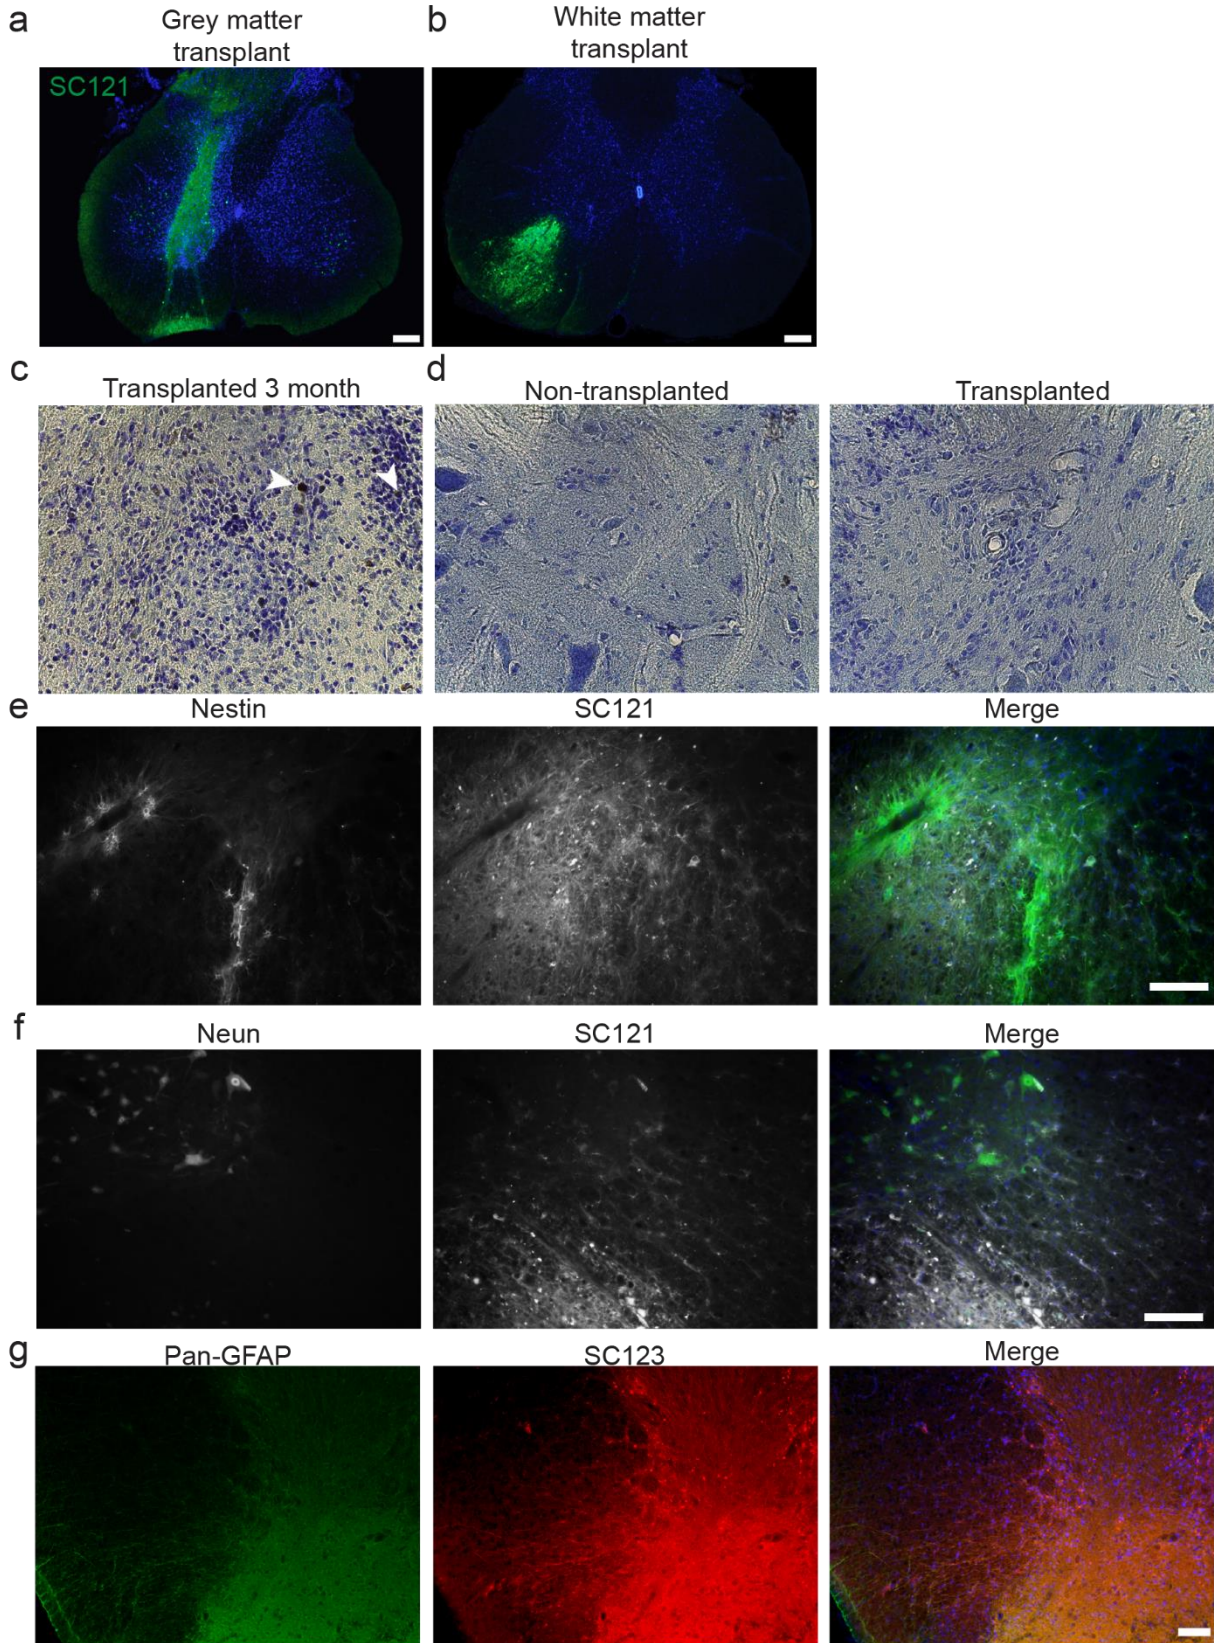

**Figure S4: Extended characterization of long-term iNPC-GDNF grafts in the nude rat spinal cord, related to Figure 4.** Grafts at 9 months stained for (a) SC121. Ki67 immunohistochemistry with H&E counterstain of grafts at (b) 3- and (c) 9-months post-transplantation. White arrows indicate examples of positive cells. Immunofluorescence showing iNPC-GDNF stained with SC121 along with (e) Nestin and (f) Neun. (g) pan-GFAP and human-specific GFAP (SC123). Scale bars = 250  $\mu$ m (a,b) and 100  $\mu$ m (e-g).

### Supplemental Table

| Cluster | fNPC-GDNF | iNPC-GDNF |
|---------|-----------|-----------|
| 0       | 95%       | 5%        |
| 1       | 33%       | 67%       |
| 2       | 0%        | 100%      |
| 3       | 36%       | 64%       |
| 4       | 1%        | 99%       |
| 5       | 37%       | 63%       |
| 6       | 52%       | 48%       |
| 7       | 94%       | 6%        |
| 8       | 100%      | ND        |
| 9       | 53%       | 47%       |
| 10      | 100%      | ND        |

**Table S1: snRNA-seq cluster composition, related to Figure 1.** Percent contribution of each cluster by cell source.

## Supplemental Experimental Procedures

### Materials

| Reagent                                | Manufacturer                 | Catalogue # |
|----------------------------------------|------------------------------|-------------|
| E8 media                               | Produced in house            | N/A         |
| Versene                                | Thermo Fisher Scientific     | 15040066    |
| Accutase                               | Sigma                        | SCR005      |
| PS TC plates                           | Fisher                       | 08-772-1B   |
| Y27632                                 | Stemgent                     | 04-0012-02  |
| DMEM/F12                               | Thermo Fisher Scientific     | 11320082    |
| Neurobasal                             | Thermo Fisher Scientific     | 21103049    |
| N2                                     | Thermo Fisher Scientific     | 17502048    |
| B27-vitamin A                          | Thermo Fisher Scientific     | 12587010    |
| MEM Non-Essential Amino Acids Solution | Thermo Fisher Scientific     | 11140050    |
| L-glutamine                            | Thermo Fisher Scientific     | 25030081    |
| Human insulin                          | Thermo Fisher Scientific     | 12585014    |
| LDN-193189                             | Stemgent                     | 04-0074-02  |
| SB431542                               | Cayman Chemicals             | 13031       |
| Stemline media                         | Sigma                        | S3194       |
| Human EGF                              | Peptotech                    | AF-100-15   |
| Human FGF2                             | Peptotech                    | 100-18B     |
| Human LIF                              | Sigma                        | LIF1010     |
| Heparin                                | Sigma                        | H3149       |
| Poly-HEMA                              | Thermo Fisher Scientific     | P3932       |
| PS TC Flasks                           | Thermo Fisher Scientific     | 29185-308   |
| TrypLE                                 | Thermo Fisher Scientific     | 12604013    |
| cGMP-grade lenti-SIN-WP-mPGK-GDNF      | Indiana University           | N/A         |
| Cell freezing medium                   | Sigma                        | C6295       |
| poly-l-ornithine (PLO)                 | Sigma                        | P4638       |
| Matrigel                               | Corning                      | 354230      |
| Paraformaldehyde (PFA)                 | Fisher                       | 50-980-495  |
| Phosphate buffered saline (PBS)        | Fisher                       | MT21031CV   |
| Triton X-100                           | Fisher                       | AAA16046AP  |
| Tris buffered saline (TBS)             | Bio-Rad                      | 1706435     |
| Normal horse serum                     | Vector                       | S-2000-20   |
| Normal donkey serum                    | Sigma                        | 566460      |
| Bovine serum albumin                   | Sigma                        | A9418       |
| Vectashield mounting medium            | Vector                       | H-1000-10   |
| Hematoxylin                            | Sigma                        | HHS3201L    |
| Lithium carbonate                      | Rowley Biochemicals          | K-680-1     |
| 0.1% ammonia water                     | Electron Microscopy Sciences | 26698-02    |
| Eosin                                  | Sigma                        | HT110332    |
| Permanent mounting media               | Thermo Fisher Scientific     | 4112        |



## Antibodies

| Application | Antibody                              | Manufacturer             | Catalogue #                | Dilution |
|-------------|---------------------------------------|--------------------------|----------------------------|----------|
| ICC         | GFAP                                  | Dako                     | Z0334                      | 1:2000   |
| ICC         | S100 $\beta$                          | Sigma                    | S2532-.2ML                 | 1:1000   |
| ICC, IHC    | Alexa Fluor 488                       | Invitrogen               | A21206                     | 1:500    |
| ICC, IHC    | Alexa Fluor 594                       | Invitrogen               | A21203                     | 1:500    |
| Flow        | Alexa Fluor 647                       | Invitrogen               | A32733                     | 1:500    |
| ICC, IHC    | 49,69-diamidino-2-phenylindole (DAPI) | Thermo Fisher Scientific | D1306                      | 300nM    |
| IHC         | Cone Arrestin                         | Millipore                | AB15282                    | 1:10,000 |
| IHC         | Synaptophysin                         | Millipore                | 573822                     | 1:2,000  |
| IHC         | Human Nuclei                          | Millipore                | MAB1281                    | 1:300    |
| IHC         | Human Nestin (eye)                    | Millipore                | ABD69                      | 1:2,000  |
| IHC         | Human Nestin (spinal cord)            | Millipore                | ABD69                      | 1:500    |
| IHC         | GFAP (eye)                            | Millipore                | SAB2107063                 | 1:1,000  |
| IHC         | GFAP (spinal cord)                    | Dako                     | Z0334                      | 1:2000   |
| IHC         | Ki67 (eye)                            | Millipore                | AB9260                     | 1:500    |
| IHC         | Ki67 (spinal cord)                    | Thermo Fisher Scientific | RM-9106-S                  | 1:200    |
| IHC         | SC123                                 | Takara Bio               | Y40420                     | 1:500    |
| IHC         | SC121 (spinal cord)                   | Takara Bio               | Y40410                     | 1:50     |
| IHC         | GDNF (spinal cord)                    | R&D Systems              | BAF212                     | 1:50     |
| IHC         | ChAT                                  | R&D Systems              | AF3447                     | 1:100    |
| IHC         | IBA1                                  | Novus Biologicals        | NB100-1028                 | 1:300    |
| IHC         | Neun                                  | Cell Signaling           | 24307                      | 1:250    |
| IHC         | Biotinylated Secondaries              | Vector                   | Vector, BA-9500 or BA-1100 | 1:200    |
| IHC         | Avidin-Biotin Complex                 | Vector                   | PK-4000                    | N/A      |
| IHC         | DAB kit                               | Vector                   | SK-4100                    | N/A      |
| IHC         | Alexa Fluor 488 (anti Goat)           | Invitrogen               | A11055                     | 1:500    |
| Flow        | GFAP                                  | Dako                     | Z0334                      | 1:250    |
| Flow        | Rabbit isotype control                | Cell Signaling           | 3900S                      | 1:250    |

## Cell culture media formulations

| Differentiation Media | Reagent                                |
|-----------------------|----------------------------------------|
| 50%                   | DMEM/F12                               |
| 50%                   | Neurobasal                             |
| 1%                    | N2                                     |
| 2%                    | B27-vitamin A                          |
| 1%                    | MEM Non-Essential Amino Acids Solution |
| 2mM                   | L-glutamine                            |
| 5 $\mu$ g/mL          | human insulin                          |
| 1 $\mu$ M             | LDN-193189                             |
| 2 $\mu$ M             | SB431542                               |

| SEFL Media   | Reagent        |
|--------------|----------------|
| Full Volume  | Stemline media |
| 100ng/mL     | human EGF      |
| 100ng/mL     | human FGF2     |
| 10ng/mL      | human LIF      |
| 5 $\mu$ g/mL | Heparin        |

## Single Nuclei RNA Sequencing

**Nuclei isolation:** Nuclei isolation was based on a modified published protocol (Corces et al., 2017). All steps were performed on ice. Frozen cell pellets were thawed on ice, resuspended in cold homogenization buffer (5mM MgCl<sub>2</sub>, 3mM Mg(Ac)<sub>2</sub>, 10mM Tris pH7.8, 0.017 mM PMSF, 0.17 mM β-mercaptoethanol (β-Me), 320 mM Sucrose, 0.1 mM EDTA, 0.1% NP40, RNase inhibitors, and Protease inhibitors), and transferred to a glass dounce. Cells were manually lysed. Homogenate was filtered using 70 μm Flowmi pipette tip filters and gently mixed 1:1 with a 50% Iodixanol solution (5mM MgCl<sub>2</sub>, 3mM Mg(Ac)<sub>2</sub>, 10mM Tris pH7.8, 0.017 mM PMSF, 0.17 mM β-Me, RNase inhibitors, Protease inhibitors, and 50% Iodixanol). A centrifugation gradient was set up using 600 μl 40% Iodixanol solution (5mM MgCl<sub>2</sub>, 3mM Mg(Ac)<sub>2</sub>, 10mM Tris pH7.8, 0.017 mM PMSF, 0.17 mM β-Me, RNase inhibitors, Protease inhibitors, 160 mM Sucrose, 0.2 μg/μl OrangeG, and 40% Iodixanol), 600 μl 29% Iodixanol solution (5mM MgCl<sub>2</sub>, 3mM Mg(Ac)<sub>2</sub>, 10mM Tris pH7.8, 0.017 mM PMSF, 0.17 mM β-Me RNase inhibitors, Protease inhibitors, 160 mM Sucrose, and 29% Iodixanol) and 800 μl of the 50% Iodixanol + Sample mixture (25% Iodixanol final concentration). This was centrifuged at 3000 x g for 1 hour with breaks disengaged. Any debris on the surface was removed, and 200 μl of the thin cloudy layer containing the nuclei was extracted, mixed with 1.8 ml PBS + 1% BSA solution, and centrifuged at 500 x g for 10 minutes with breaks engaged. 1.8 ml supernatant was removed and the remaining 200 μl plus nuclei pellet was resuspended in 1.8 ml PBS + 1% BSA solution. The nuclei suspension was counted via hemocytometer and checked for nucleus quality. A portion of this suspension was diluted to the correct nuclei concentration for the 10x Chromium NextGEM 3' protocol with a target of ~4,000 nuclei per sample.

**Single nuclei library preparation and sequencing:** The standard 10x protocol was used per the "Chromium NextGEM Single Cell 3' Reagent Kits v3.1 User Guide, Rev D" (single index). Briefly, nuclei were resuspended in the master mix and loaded together with partitioning oil and gel beads into the chip to generate the gel bead-in-emulsion (GEM). The poly-A RNA from the nucleus lysate contained in every single GEM was retrotranscribed to cDNA, which contains an Illumina R1 primer sequence, Unique Molecular Identifier (UMI) and the 10x Barcode. The pooled, barcoded cDNA was then cleaned up with Silane DynaBeads, amplified by PCR, and the appropriately sized fragments were selected with SPRIselect reagent for subsequent library construction. The amplified cDNA and sequencing libraries were quality checked using an Agilent 2100 BioAnalyzer (Agilent Technologies, Santa Cruz CA) using a High Sensitivity DNA chip. Barcoded sequencing libraries were quantified by qPCR on a QuantStudio12k Flex (Thermo Fisher Scientific, Waltham, MA) system using the Colibri Library Quantification Kit (Thermo Fisher Scientific). The uniquely indexed libraries were pooled at equal ratio and sequenced on a NovaSeq 6000 (Illumina, San Diego, CA), with a sequencing depth of ~50,000 reads/cell. Raw sequencing data were demultiplexed and converted to FASTQ format using bcl2fastq v2.20.

**Single nuclei data analysis:** Demultiplexed fastq files were run via CellRanger v6.1.2 using the "cellranger count" command with the "--include-introns" option using the precompiled CellRanger human reference sequence "v2020-A" provided on the 10x Genomics website. CellRanger output "filtered\_feature\_bc\_matrix files" (barcodes.tsv.gz, features.tsv.gz & matrix.mtx.gz) were loaded into R (v4.2.1, <https://www.R-project.org/>) via Rstudio (v2022.07.1, Build 554) and combined into one matrix file per sample with genes as rows (with both gene symbol and Ensembl ID) and cells (nuclei) as columns. Each matrix file was then processed by summing all Ensembl IDs with the same gene symbol to the gene symbol level via standard R matrix processing functions. The gene-summed matrices were loaded into the Seurat R package (v4.1.1) keeping all genes that

were expressed in more than one cell (Hao et al., 2021). All samples were merged into a single Seurat object (7,959 nuclei) and filtered by removing all cells with counts, genes, mitochondrial gene percentage, and ribosomal gene percentage outside of three standard deviations from the mean (7,472 nuclei). The samples were then split and normalized, and variable features were identified. Integration features were then selected and used to scale the data and run principal component analysis (PCA). Integration anchors were identified via the Seurat function “FindIntegrationAnchors()”, and these anchors were used to integrate the samples into a single Seurat object. The integrated object was scaled again to account for the scale of the whole data set. PCA was run on the integrated object using 50 principal components (PCs). The number of “meaningful PCs” used in subsequent analysis was determined by comparing the actual contributed variance of each PC versus the hypothetical situation where each PC would contribute equally to the variance. 13 PCs contributed more variance than the calculated hypothetical equal-variance level and were considered “meaningful”. These 13 PCs were used in the subsequent analysis. Next, the nuclei were clustered using the Seurat functions “RunUMAP()”, “FindNeighbors()”, and “FindClusters()”. A resolution factor of 0.5 identified 10 distinct clusters. For generation of UMAP plots, the RNA slot in the integrated Seurat object was processed with the Seurat functions “NormalizeData()”, “FindVariableFeatures()”, and “ScaleData()” using all genes present in the data set for the “features” option of “ScaleData()”. The Venn diagram was generated using the “Venn()” function in the Vennerable R package (<https://github.com/js229/Vennerable>).

**Flow cytometry:** Cells from 3 cryopreserved vials of iNPC-GDNFs were split at thaw with half fixed immediately in 4% paraformaldehyde (PFA) (D0) and half plated for 7 days (D7) for differentiation as a monolayer culture. Monolayer grown cells were washed once in phosphate buffered saline (PBS) then 1mL Accutase was added to each well and incubated for 5 mins at 37°C. Singularized cells were collected and pelleted by centrifugation (1500 RPM for 3 mins). Cells were gently resuspended in 4% PFA in PBS and allowed to fix for 10-15 mins at room temperature. All fixed single cells were permeabilized using 1% Triton X-100 and stained using primary antibodies against GFAP or an isotype control (1:250) overnight at 4 °C. Samples were washed 3 times in PBS with 0.1% TritonX-100 and 5% NDS. Secondary antibodies (Alexa Fluor 647) were used at 1:500 at room temperature for one hour. Stained samples were quantified on an LSR Fortessa cytometer using BD FACSDiva software and analyzed using FloJo software.

**Animals:** Given our extensive knowledge that neural progenitor cells alone are less effective than cells producing GDNF, and to uphold the 3Rs to “replace, reduce and refine” animal use (Hubrecht and Carter, 2019), studies did not use iNPC alone rat cohorts. Animals were housed and maintained at the Cedars-Sinai Department of Comparative Medicine vivarium. All animal studies were approved and supervised by the Institutional Animal Care and Use Committee and all animals were treated in accordance with the ARVO Statement for the Use of Animals in Ophthalmic and Vision Research.

**Visual function testing:** All rats were tested by optokinetic response (OKR) and electroretinography (ERG) at approximately P60 and P90, according to our published protocols (Gamm et al., 2007; Wang et al., 2008). Animals were tested for spatial visual acuity using an optometry testing apparatus. This device consists of a rotating cylinder covered with a vertical sine wave grating presented in virtual three-dimensional (3-D) space on four computer monitors arranged in a square. Unrestrained rats were placed on a platform in the center of the square, where they tracked the grating with reflexive head movements. The spatial frequency of the grating was clamped at the viewing position by repeatedly re-centering the ‘cylinder’ on the head of the test subject. Acuity was quantified by increasing the spatial frequency of the grating using

a psychophysics staircase progression until the optokinetic reflex was lost, thereby obtaining a maximum threshold. Dark adapted full field ERG responses were recorded following our published protocol (Tsai et al., 2015). Special care was taken to maintain electrode placement in a consistent position in all animals. Averages of 3–5 traces (set 2 minutes apart to ensure recovery of rod responsiveness) were obtained.

### **Histology and Immunohistochemistry**

**RCS model:** Eyes from the RCS rats were removed and post-fixed in 4% PFA for 1-2 hour, then placed in 10%, 20% sucrose for 1 hour, and placed in 30% sucrose at 4 °C overnight. The corneas and lenses were removed, and the eyes were embedded in optimal cutting temperature compound (OCT). Sectioning was performed on a cryostat and retinal sections were collected in 5 series according to our previous protocol (Tsai et al., 2015). One of every five slides was stained with cresyl violet (CV) and the remaining slides were stored at –80 °C for antibody staining. CV-stained images were acquired with a regular bright field microscope and ProgRes capture system (Jenoptik, Jupiter, FL). Retinal sections were immunohistochemically stained according to our published protocol (Tsai et al., 2015).

**Quantification of outer nuclear layer:** ONL thickness and donor cell distribution were measured on cresyl violet-stained sections (6 retinas, 6 sections/retina). Retinal montage sections were prepared for measuring the length of the preserved ONL as compared to the whole retinal length. Measurements were made using Java-based image processing software (ImageJ; National Institutes of Health, Bethesda, MD).

**SOD1<sup>G93A</sup> and nude rat models:** Spinal cords were removed, post-fixed in 4% PFA for 24 h, and transferred to 30% sucrose until the tissue sank. The lumbar region was then sectioned at 35 μm sections using a microtome. Sections were washed 3 times in PBS for 5 min, quenched in 3% hydrogen peroxide/3% methanol for 10 min, then washed 3 times in 0.5% Triton X-100 in 1X Tris buffered saline (TBS). Sections were then blocked in 5% Normal Horse Serum and 2% Bovine Serum Albumin for 60 mins at room temperature, followed by overnight incubation at 4°C in primary antibodies. Sections were washed with 0.2% Triton X-100 in 1X TBS 3 times for 10 min, then placed into the appropriate biotinylated or fluorescent secondary antibodies for 1.5 to 2 hours at room temperature. Sections with immunofluorescent staining were washed 3 times for 5 min in 1X TBS, incubated with DAPI for 2 minutes, and washed again with 1X TBS 3 times for 5 min each before being mounted onto slides and coverslipped using Vectashield mounting medium. Sections incubated with biotinylated secondary antibodies were placed in Avidin-Biotin Complex for 1 hour at room temperature and then washed 3 times for 10 min each in 0.2% Triton X-100 in 1X TBS. A DAB kit was used for chromogenic detection with 3,3'-Diaminobenzidine. Sections were then washed twice for 5 min each in 1X TBS, mounted onto slides, dehydrated, and coverslipped with permanent mounting media.

### **Supplemental References**

Corces, M.R., Trevino, A.E., Hamilton, E.G., Greenside, P.G., Sinnott-Armstrong, N.A., Vesuna, S., Satpathy, A.T., Rubin, A.J., Montine, K.S., Wu, B., et al. (2017). An improved ATAC-seq protocol reduces background and enables interrogation of frozen tissues. *Nat. Methods* 14, 959–962.

Hao Y., Hao S., Andersen-Nissen E., Mauck W.M. 3rd, Zheng S., Butler A., Lee M.J., Wilk A.J., Darby C., Zager M., et al. (2021) Integrated analysis of multimodal single-cell data. *Cell*. 184, 3573–3587.e29.

Hubrecht, R.C., and Carter, E. (2019). The 3rs and humane experimental technique: implementing change. *Animals (Basel)* 9.
